# Supplementary material for: Joint inference of evolutionary transitions to self-fertilization and demographic history using whole-genome sequences
Source: eLife. 2023 May 11;12:e82384. doi: 10.7554/eLife.82384 (PMC10306369; doi:10.7554/eLife.82384)
Supplement: Supplementary file 1. — Parameters for simulated datasets to investigate the performance of tsABC. Table S2: Parameter priors used for the performance analysis of tsABC. Table S3: Parameter priors used to estimate the transition from outcrossing to selfing in A. thaliana. Table S4: A. thaliana samples with >95% cluster membership (https://1001genomes.github.io/admixture-map/) used to estimate the transition from outcrossing to selfing obtained from the 1001 genomes website (https://1001genomes.org/data/GMI-MPI/releases/v3.1/SNP_matrix_imputed_hdf5/1001_SNP_MATRIX.tar.gz). Table S5: Genomic regions of A. thaliana in TAIR10 used for the tsABC and teSMC analyses. Table S6: Jointly estimated parameters in the context of transitions from predominant outcrossing to predominant selfing in A. thaliana. [file elife-82384-supp1.xlsx]

## Sheet: Table S1
Parameters for simulated datasets to investigate the performance of tsABC
Model	Parameter	Value
A	N	40000
A	SIGMA_PRES	0.99
A	SIMGA_ANC	0.1
A	T_SIGMA	t ϵ(0.05, 10)

## Sheet: Table S2
Parameter priors used for the performance analysis of tsABC
Model	Parameter	lower	upper	type
A	N	10000	200000	logunif
A	SIGMA_PRES	0.5	1	uniform
A	SIMGA_ANC	0	0.2	uniform
A	T_SIGMA	1000	500000	logunif
B	N_ANC	1000	200000	logunif
B	N_PRES	1000	200000	logunif
B	SIGMA	0.5	1	uniform
B	T_N	1000	500000	logunif

## Sheet: Table S3
Parameter priors used to estimate the transition from outcrossing to selfing in A. thaliana
Parameter	lower	upper	type
N_PRES	50000	500000	logunif
N_ANC	50000	1000000	logunif
T_N	10000	1000000	uniform
SIGMA_PRES	0.5	0.1	uniform
SIMGA_ANC	0	0.2	uniform
T_SIGMA	10000	500000	logunif

## Sheet: Table S4
A. thaliana samples with > 95% cluster membership (http://1001genomes.github.io/admixture-map/) used to estimate the transition from outcrossing to selfing obtained from the 1001 genomes website (https://1001genomes.org/data/GMI-MPI/releases/v3.1/SNP_matrix_imputed_hdf5/1001_SNP_MATRIX.tar.gz)
ID	Cluster
403	CEU
410	CEU
424	CEU
428	CEU
430	CEU
5837	CEU
5874	CEU
5890	CEU
5893	CEU
5907	CEU
5921	CEU
5950	CEU
5984	CEU
5993	CEU
6008	CEU
6296	CEU
6390	CEU
6396	CEU
6424	CEU
6445	CEU
6903	CEU
6951	CEU
6956	CEU
6957	CEU
6975	CEU
6976	CEU
6984	CEU
7067	CEU
7103	CEU
7120	CEU
7177	CEU
7203	CEU
7207	CEU
7223	CEU
7296	CEU
7333	CEU
7349	CEU
7350	CEU
7424	CEU
7520	CEU
7521	CEU
8235	CEU
8236	CEU
8284	CEU
8285	CEU
8290	CEU
8365	CEU
8386	CEU
9664	CEU
9665	CEU
9666	CEU
9667	CEU
9668	CEU
9669	CEU
9670	CEU
9671	CEU
9672	CEU
9673	CEU
9676	CEU
9677	CEU
9678	CEU
9679	CEU
9680	CEU
9681	CEU
9682	CEU
9683	CEU
9684	CEU
9685	CEU
9686	CEU
9687	CEU
9689	CEU
9690	CEU
9692	CEU
9693	CEU
9694	CEU
9695	CEU
9696	CEU
9727	CEU
9728	CEU
9729	CEU
9730	CEU
9731	CEU
9732	CEU
9733	CEU
9735	CEU
9914	CEU
9915	CEU
9930	CEU
9973	CEU
9974	CEU
9975	CEU
9978	CEU
10020	CEU
15591	CEU
15592	CEU
15593	CEU
19949	CEU
19950	CEU
19951	CEU
6933	IBnr
6961	IBnr
6970	IBnr
6971	IBnr
7327	IBnr
7328	IBnr
9507	IBnr
9510	IBnr
9511	IBnr
9514	IBnr
9515	IBnr
9521	IBnr
9522	IBnr
9524	IBnr
9525	IBnr
9534	IBnr
9535	IBnr
9537	IBnr
9540	IBnr
9541	IBnr
9544	IBnr
9547	IBnr
9556	IBnr
9557	IBnr
9560	IBnr
9562	IBnr
9564	IBnr
9567	IBnr
9568	IBnr
9577	IBnr
9582	IBnr
9588	IBnr
9594	IBnr
9602	IBnr
9821	IBnr
9822	IBnr
9825	IBnr
9833	IBnr
9834	IBnr
9836	IBnr
9840	IBnr
9841	IBnr
9843	IBnr
9844	IBnr
9845	IBnr
9852	IBnr
9856	IBnr
9857	IBnr
9859	IBnr
9861	IBnr
9864	IBnr
9867	IBnr
9868	IBnr
9870	IBnr
9873	IBnr
9876	IBnr
9878	IBnr
9886	IBnr
9888	IBnr
9899	IBnr
9900	IBnr
9902	IBnr
9904	IBnr
9943	IBnr
9946	IBnr
9950	IBnr
9533	Relicts
9542	Relicts
9543	Relicts
9545	Relicts
9549	Relicts
9554	Relicts
9555	Relicts
9583	Relicts
9600	Relicts
9832	Relicts
9869	Relicts
9871	Relicts
9879	Relicts
9887	Relicts
9905	Relicts
9944	Relicts
9947	Relicts

## Sheet: Table S5
Genomic regions of A. thaliana in TAIR10 used for the tsABC and teSMC analyses
Chromosome	Start	End
1	6500000	7500000
2	16000000	17000000
3	6000000	7000000
4	13000000	14000000
5	1500000	2500000

## Sheet: Table S6
Jointly estimated parameters in the context of transitions from predominant outcrossing to predominant selfing in Arabidopsis thaliana.
Population	Parameter	Mode	95% credibility interval
CEU	N_PRES	340366	233453	458132
	N_ANC	462241	312446	821512
	T_N	573224	84539	976272
	SIGMA_PRES	0.9959	0.994	0.9971
	SIGMA_ANC	0.001	0.007	0.1927
	T_SIGMA	707995	443486	973841
IBnr	N_PRES	268731	181153	371060
	N_ANC	517442	353419	855635
	T_N	498924	80265	956742
	SIGMA_PRES	0.9934	0.004	0.9971
	SIGMA_ANC	0.0911	0.0068	0.1896
	T_SIGMA	756976	397049	988708
Relicts	N_PRES	393593	313220	472324
	N_ANC	384690	275425	703124
	T_N	786033	241832	990383
	SIGMA_PRES	0.9971	0.9961	0.9977
	SIGMA_ANC	0.0865	0.0053	0.1887
	T_SIGMA	592321	386406	934499
